# Supplementary material
Source: PubMed Central journal article supplement (PMC6830508)
Supplement: NIHMS1536246-supplement-8.pdf [file NIHMS1536246-supplement-8.pdf]

**Table S1. ISG.RS and IFNG.GS genes, Related to Figure 1.**

| ISG.RS   | IFNG.GS |          |          |          |         |
|----------|---------|----------|----------|----------|---------|
| IFI27    | TNFSF10 | NLRC5    | CCL5     | PFKP     | GZMA    |
| IRF7     | IRF9    | NMI      | RNF31    | CD38     | IFNAR2  |
| USP18    | PSMB9   | IDO1     | SOD2     | ZBP1     | CD74    |
| BST2     | EPSTI1  | PSMB10   | PSMA3    | BANK1    | RAPGEF6 |
| CXCL10   | PARP12  | CXCL11   | RNF213   | TOR1B    | CASP4   |
| DDX60    | TRIM25  | ITGB7    | PELI1    | RBCK1    | FAS     |
| HERC6    | LAP3    | SAMHD1   | CFB      | PDE4B    | OGFR    |
| HLA-B    | CASP7   | CMPK2    | CD86     | MVP      | ARL4A   |
| HLA-G    | UPP1    | SAMD9L   | TXNIP    | IL7      | LYSMD2  |
| IFI35    | B2M     | RTP4     | HLA-DQA1 | BPGM     | CSF2RB  |
| IFI44    | IRF4    | PTPN2    | GCH1     | FTSJD2   | ST3GAL5 |
| IFI44L   | SRI     | PARP14   | PNP      | AUTS2    | C1R     |
| IFIT1    | NFKBIA  | TNFAIP2  | CCL7     | RIPK2    | CASP3   |
| IFIT3    | IFIT2   | IFITM2   | PTPN6    | CD69     | CMKLR1  |
| ISG15    | OAS2    | SOCS1    | SPPL2A   | MYD88    | METTL7B |
| LGALS3BP | TAP1    | CASP1    | IL4R     | PSMA2    | ST8SIA4 |
| LY6E     | EIF2AK2 | ICAM1    | PNPT1    | PIM1     | XCL1    |
| MX1      | RSAD2   | WARS     | DHX58    | NOD1     | IL2RB   |
| MX2      | IRF1    | PSME1    | BTG1     | CFH      | VAMP5   |
| OAS3     | XAF1    | ISG20    | CASP8    | TAPBP    | IL18BP  |
| OASL     | SP110   | IRF2     | IFI30    | SLC25A28 | ZNFX1   |
| PLSCR1   | PSMB8   | FCGR1A   | CCL2     | PTPN1    | ARID5B  |
| STAT1    | IFITM3  | MARCH1   | FGL2     | TNFAIP3  | APOL6   |
| TRIM14   | GBP4    | SOCS3    | SECTM1   | SSPN     | STAT4   |
| HSD17B1  | IRF8    | JAK2     | IL15RA   | NUP93    |         |
| OAS1     | PML     | HLA-DMA  | CD40     | MTHFD2   |         |
| CA2      | IFIH1   | TNFAIP6  | TRAFF1   | CDKN1A   |         |
| CCNA1    | UBE2L6  | TRIM26   | HLA-DRB1 | NFKB1    |         |
| CXCL1    | ADAR    | VCAM1    | GBP6     | BATF2    |         |
| GALC     | STAT2   | CD274    | LCP2     | LATS2    |         |
| IFI6     | CXCL9   | CIITA    | MT2A     | IRF5     |         |
| IFITM1   | IL10RA  | NAMPT    | RIPK1    | SLAMF7   |         |
| LAMP3    | PLA2G4A | SELP     | KLRK1    | ISOC1    |         |
| MCL1     | TRIM21  | GPR18    | PSMB2    | P2RY14   |         |
| ROBO1    | PTGS2   | FPR1     | TDRD7    | STAT3    |         |
| SLC6A15  | C1S     | PRIC285  | HIF1A    | NCOA3    |         |
| THBS1    | DDX58   | PSME2    | EIF4E3   | HLA-A    |         |
| TIMP3    | IL15    | SERPING1 | VAMP8    | IL6      |         |

**Table S2. Marker genes used for identifying intratumoral immune cell clusters in single-cell RNA-sequencing data, Related to STAR Methods.**

|         |        |
|---------|--------|
| Gzmb    | Mrc1   |
| Mki67   | Cd68   |
| Sell    | Csf1r  |
| Klrg1   | Fcgr3  |
| Nkg7    | Mybl1  |
| Cd3d    | Fcer1a |
| Cd3e    | Fcgr1  |
| Cd3g    | Cd24a  |
| Cd8a    | Batf3  |
| Prf1    | Itgae  |
| Cd4     | Irf8   |
| Foxp3   | Ccr7   |
| Il17a   | Zbtb46 |
| Icos    | Flt3   |
| Ifngr1  | Xcr1   |
| Klrd1   | Clec9a |
| Cxcr3   | Cd209a |
| Bcl6    | Ccr2   |
| Il10    | Cx3cr1 |
| Ncr1    | Ms4a1  |
| Klrb1c  | Cd19   |
| Itgax   | Tlr2   |
| Itgam   | C5ar1  |
| Ly6g    | Csf3r  |
| Ly6c1   | Cxcr1  |
| Adgre1  | Cxcr2  |
| Cd14    | Cd34   |
| Fcgr2b  | Pdgfrb |
| Mertk   | Pdgfra |
| Siglec1 | Kit    |
| Mafb    | Col1a1 |
